# Supplementary material for: Establishment and validation of a guinea pig model for human congenital toxoplasmosis
Source: PubMed Central journal article supplement (PMC8344189; doi:10.1186/s13071-021-04890-4), 2021-08-06

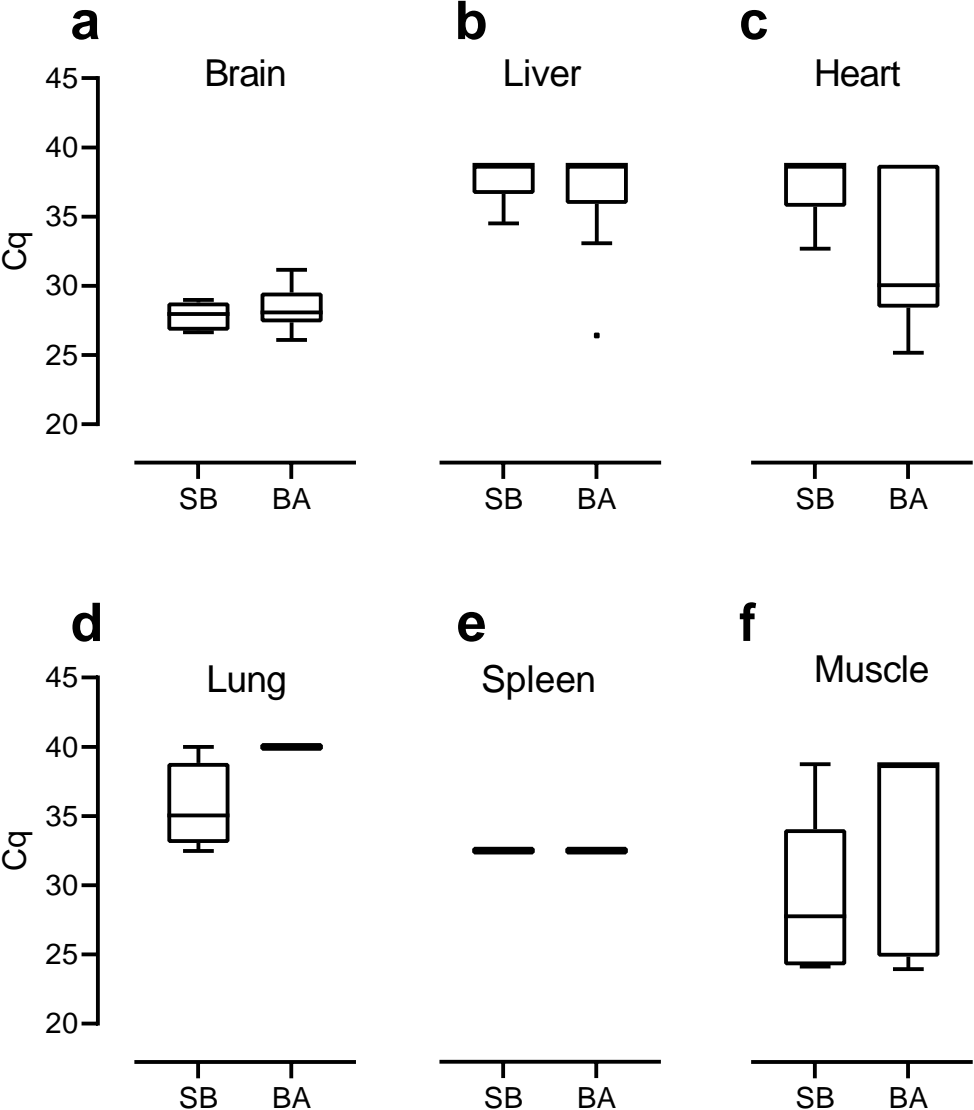

Supplement: 13071_2021_4890_MOESM3_ESM.pdf [file 13071_2021_4890_MOESM3_ESM.pdf]
